# Supplementary material for: Management of peripheral arterial disease in diabetes: a national survey of podiatry practice in the United Kingdom
Source: Springer Nature journal article supplement (doi:10.1186/s13047-018-0270-5), 2018-01-01
Supplement: MOESM1 [file 15833606]

**Thank you for participating in our survey**

**Dear Colleague,**

**Thank you for taking the time to participate in this survey. Diabetic foot complications are frequent and extremely challenging to manage. Peripheral arterial disease (PAD) is a major risk factor for the development of foot ulceration, limb loss and overall mortality. However, its detection in diabetes can be difficult.**

**In this National survey, we aim to explore:**

- 1. current practice patterns in PAD screening, and**
- 2. Vascular referral pathways**

**With your help we hope to identify areas for potential quality improvement in the future. The Survey should take approximately 5 minutes to complete. With your help we hope to identify areas for potential quality improvement in the future.**

**Thank you for participating!**

Imperial College Healthcare   
NHS Trust

\* What is your occupation?

\* How many years have you worked in this capacity?

\* In which sector do you work?

NHS

Private

If you work in the NHS, what is your banding?

\* In which region of the UK do you work?

East

East Midlands

London

North East

North West

Northern Ireland

Scotland

South East

South West

Wales

West Midlands

Yorkshire And The Humber

\* How many diabetic patients do you see per week?

\* How long is your typical appointment slot with each patient?

\* Do you have access to advice from a vascular surgeon via an MDT?

- Yes
- No
- Unsure

## Peripheral Arterial Disease in Diabetes; A National Survey of Podiatry Practice

### Screening for arterial disease in diabetic patients

\* Which patients with diabetes do you routinely screen for peripheral arterial disease (PAD)?

- All patients
- Neuropathy
- Ulceration
- Foot infection
- Charcot arthropathy
- Gangrene

\* How confident are you in your ability to accurately screen for PAD in diabetic patients?

0 (not at all confident)                      50 (unsure)                      100 (very confident)

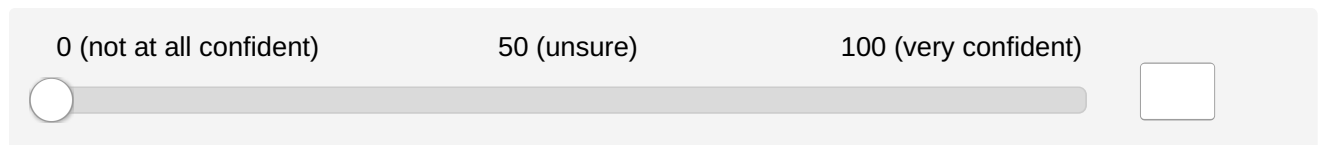

\* Do you feel that you have received adequate training in detecting PAD?

- Yes
- No
- Unsure

\* Which of the following do you routinely perform as part of your screening (tick all that apply) for PAD?

- History
- Capillary refill time
- Palpation of foot pulses
- Audible handheld Doppler waveform assessment
- Ankle-brachial pressure index (ABPI)
- Toe-brachial pressure index (TBI)
- Transcutaneous oxygen tension (TcPO2)

\* Please score the following options to indicate their importance to your clinical assessment.

|                                              | N/A (not used in clinical assessment) | Not at all important  | Not important         | Unsure                | Important             | Very important        |
|----------------------------------------------|---------------------------------------|-----------------------|-----------------------|-----------------------|-----------------------|-----------------------|
| History                                      | <input type="radio"/>                 | <input type="radio"/> | <input type="radio"/> | <input type="radio"/> | <input type="radio"/> | <input type="radio"/> |
| Capillary refill time                        | <input type="radio"/>                 | <input type="radio"/> | <input type="radio"/> | <input type="radio"/> | <input type="radio"/> | <input type="radio"/> |
| Palpation of foot pulses                     | <input type="radio"/>                 | <input type="radio"/> | <input type="radio"/> | <input type="radio"/> | <input type="radio"/> | <input type="radio"/> |
| Audible handheld Doppler waveform assessment | <input type="radio"/>                 | <input type="radio"/> | <input type="radio"/> | <input type="radio"/> | <input type="radio"/> | <input type="radio"/> |
| Ankle- brachial pressure index (ABPI)        | <input type="radio"/>                 | <input type="radio"/> | <input type="radio"/> | <input type="radio"/> | <input type="radio"/> | <input type="radio"/> |
| Toe-brachial pressure index (TBI)            | <input type="radio"/>                 | <input type="radio"/> | <input type="radio"/> | <input type="radio"/> | <input type="radio"/> | <input type="radio"/> |
| Transcutaneous oxygen tension (TcPO2)        | <input type="radio"/>                 | <input type="radio"/> | <input type="radio"/> | <input type="radio"/> | <input type="radio"/> | <input type="radio"/> |

\* Do you think ABPI (<0.9 considered abnormal) is a reliable test to exclude PAD in diabetic patients?

- Yes
- No
- Unsure

\* Approximately how many patients do you typically refer for further vascular assessment?

Per month

Per year

\* If you suspect PAD in a patient with diabetes, when would you refer for further Vascular assessment?

- If there is any active foot ulceration
- If there is an ulcer which has not improved within 6 weeks despite optimal management
- If there is evidence of infection
- If they need local debridement
- I would refer any patient with suspected PAD and diabetes for further assessment

\* When you do refer a patient for further Vascular assessment, do you always receive the outcome of the patients visit?

- Yes
- No

\* In the last one year, are you aware of any patients who had PAD which was previously missed on clinical examination?

- Yes
- No
- Unsure

If so, did this contribute to a minor/ major amputation in any of these cases?

- Yes
- No
- Unsure

## Peripheral Arterial Disease in Diabetes; A National Survey of Podiatry Practice

### Vascular referral pathway

\* Can you directly refer a patient for an arterial duplex ultrasound scan ?

- Yes
- No
- Unsure

If yes, how long does it take to have a duplex ultrasound scan performed?

- <1 week
- 1-2 weeks
- 2-3 weeks
- 3-4 weeks
- >4 weeks

If yes, is the waiting time clinically appropriate?

- Appropriate
- Too Long
- Unsure

\* On average how long do your patients have to wait for a Vascular assessment by a Vascular Surgeon?

- <1 week
- 1-2 weeks
- 2-3 weeks
- 3-4 weeks
- >4 weeks

\* Do you think this is an appropriate waiting time?

- Appropriate
- Too long
- Unsure

In your opinion, what are the biggest limitations in your Vascular referral pathway?

\* In the past one year, of the patients you referred for Vascular assessment, what proportion required Vascular intervention?

- <10%
- 10-25%
- 25-50%
- 50-75%
- >75%

Peripheral Arterial Disease in Diabetes; A National Survey of Podiatry Practice

**Thank you for taking the time to complete this survey!**

Imperial College Healthcare   
NHS Trust
